# Supplementary material
Source: ML conference proceedings conference paper supplement (https://proceedings.neurips.cc/paper_files/paper/2023/hash/797be96e4481c3fe5d675c1ba5352969-Abstract.html)
Supplement: Supplementary file 1 [file 797be96e4481c3fe5d675c1ba5352969-Supplemental-Conference.zip]

Archive with 2 entries (2 files):
- PaperWithAppendix.pdf
- __MACOSX/._PaperWithAppendix.pdf
